# Supplementary material for: Genetic Variants Related to Cardiometabolic Traits Are Associated to B Cell Function, Insulin Resistance, and Diabetes Among AmeriCan Indians: The Strong Heart Family Study
Source: PubMed Central journal article supplement (PMC6194194; doi:10.3389/fgene.2018.00466), 2018-10-12
Supplement: Table_1.pdf [file Table_1.pdf]

## *Supplementary Material*

### **Genetic Variants Related to Cardiometabolic Traits Are Associated to B Cell Function, Insulin Resistance, and Diabetes among American Indians: The Strong Heart Family Study**

**Poojitha Balakrishnan\***, Dhananjay Vaidya, V. Saroja Voruganti, Karin Haack, Jack W. Kent, Jr, Kari E. North, Sandra Laston, Barbara V. Howard, Jason Umans, Elisa T. Lee, Lyle G. Best, Jean W. MacCluer, Shelley A. Cole, Ana Navas-Acien, Nora Franceschini

\* **Correspondence:** Poojitha Balakrishnan: pbalakr2@jhu.edu

#### **1 Supplementary Tables**

##### **1.1 Supplementary Table 1. SNP Associations for HOMA-B, log HOMA-IR, and incident diabetes.**

| rsID       | Chr | Position  | Alleles | MAF  | Gene                      | Locus    | Location   | Log HOMA-B |                       | Log HOMA-IR |         | Diabetes |         |
|------------|-----|-----------|---------|------|---------------------------|----------|------------|------------|-----------------------|-------------|---------|----------|---------|
|            |     |           |         |      |                           |          |            | Beta       | P-value               | Beta        | P-value | Beta     | P-value |
| rs2961831  | 5   | 50490690  | A/C     | 0.40 | <i>PARP8, LOC642366</i>   | 5q11     | intergenic | 0.08       | 0.05                  | 0.04        | 0.13    | -0.03    | 0.34    |
| rs2962246  | 5   | 50485571  | A/G     | 0.40 | <i>PARP8, LOC642366</i>   | 5q11     | intergenic | 0.08       | 0.05                  | 0.04        | 0.13    | -0.03    | 0.34    |
| rs10152552 | 15  | 23482358  | A/G     | 0.47 | <i>ATP10A</i>             | 15q11    | intron     | 0.08       | 0.03                  | 0.02        | 0.46    | -0.01    | 0.71    |
| rs883496   | 15  | 23481396  | G/A     | 0.47 | <i>ATP10A</i>             | 15q11    | intron     | -0.08      | 0.03                  | -0.02       | 0.46    | 0.01     | 0.71    |
| rs12642615 | 4   | 36914666  | G/A     | 0.38 | <i>FLJ16686, KIAA1239</i> | 4p14     | intergenic | 0.08       | 0.05                  | -0.01       | 0.95    | -0.01    | 0.70    |
| rs10777559 | 12  | 76822590  | C/A     | 0.25 | <i>NAV3</i>               | 12q21    | intron     | -0.09      | 0.04                  | -0.02       | 0.46    | 0.001    | 0.98    |
| rs4237723  | 11  | 12594808  | A/G     | 0.45 | <i>PARVA, TEAD1</i>       | 11p1     | intergenic | 0.03       | 0.36                  | -0.02       | 0.4     | -0.01    | 0.74    |
| rs38179    | 7   | 15865240  | A/G     | 0.45 | <i>MEOX2, LOC729920</i>   | 7p22-p21 | intergenic | 0.08       | 0.03                  | 0.01        | 0.76    | 0.01     | 0.65    |
| rs654993   | 6   | 160488886 | G/A     | 0.23 | <i>SLC22A1</i>            | 6q25     | intron     | 0.07       | 0.11                  | -0.01       | 0.72    | -0.002   | 0.96    |
| rs1252068  | 1   | 175868691 | A/G     | 0.35 | <i>LOC400796, SEC16B</i>  | 1q25     | intergenic | 0.02       | 0.53                  | 0.05        | 0.07    | -0.007   | 0.84    |
| rs3732678  | 3   | 12836608  | A/C     | 0.25 | <i>CAND2</i>              | 3p25     | coding     | 0.15       | 6.03x10 <sup>-4</sup> | 0.08        | 0.01    | 0.002    | 0.97    |
| rs16872183 | 8   | 106094163 | A/G     | 0.26 | <i>LRP12, ZFPM2</i>       | 8q22-q23 | intergenic | -0.10      | 0.03                  | -0.05       | 0.14    | 0.02     | 0.55    |
| rs10744770 | 12  | 110146961 | G/A     | 0.21 | <i>CUX2</i>               | 12q24    | intron     | -0.12      | 0.02                  | -0.03       | 0.39    | 0.02     | 0.62    |

|            |    |           |     |      |                            |          |            |       |                             |       |      |        |      |
|------------|----|-----------|-----|------|----------------------------|----------|------------|-------|-----------------------------|-------|------|--------|------|
| rs4766451  | 12 | 110155065 | C/A | 0.22 | <i>CUX2</i>                | 12q24    | intron     | -0.11 | 0.02                        | -0.02 | 0.51 | 0.02   | 0.54 |
| rs6748843  | 2  | 64383898  | A/G | 0.47 | <i>PEL11, LOC130773</i>    | 2p13     | intergenic | 0.00  | 0.96                        | 0.01  | 0.74 | 0.02   | 0.60 |
| rs284201   | 1  | 92012826  | G/A | 0.27 | <i>TGFBR3</i>              | 1p33-p32 | intron     | 0.03  | 0.44                        | 0.02  | 0.55 | -0.003 | 0.93 |
| rs7588499  | 2  | 54581780  | A/G | 0.49 | <i>SPTBN1</i>              | 2p21     | intron     | 0.00  | 0.92                        | -0.03 | 0.33 | 0.01   | 0.68 |
| rs4149270  | 9  | 106686898 | G/A | 0.23 | <i>ABCA1</i>               | 9q31     | intron     | -0.03 | 0.50                        | -0.01 | 0.64 | -0.001 | 0.98 |
| rs997067   | 10 | 55709300  | A/C | 0.37 | <i>PCDH15</i>              | 10q21    | intron     | -0.03 | 0.43                        | -0.05 | 0.09 | -0.01  | 0.71 |
| rs2826602  | 21 | 21198206  | G/A | 0.34 | <i>PRSS7, NCAM2</i>        | 21q21    | intergenic | -0.03 | 0.45                        | -0.01 | 0.99 | 0.004  | 0.89 |
| rs4607517  | 7  | 44202193  | G/A | 0.26 | <i>GCK, YKT6</i>           | 7p15     | intergenic | -0.11 | 0.01                        | -0.05 | 0.12 | 0.003  | 0.94 |
| rs131409   | 22 | 22221107  | A/G | 0.27 | <i>LOC388882, IGLL1</i>    | 22q11    | intergenic | 0.03  | 0.46                        | -0.04 | 0.23 | -0.005 | 0.86 |
| rs1972239  | 1  | 155775425 | A/G | 0.18 | <i>FCRL5</i>               | 1q21     | intron     | 0.17  | <i>5.30x10<sup>-4</sup></i> | 0.06  | 0.09 | 0.0001 | 0.99 |
| rs4139     | 4  | 163610383 | A/G | 0.35 | <i>FSTL5, LOC729971</i>    | 4q32     | intergenic | 0.01  | 0.82                        | -0.04 | 0.12 | -0.02  | 0.61 |
| rs9528062  | 13 | 59628504  | G/A | 0.28 | <i>DIAPH3</i>              | 13q21    | intron     | 0.01  | 0.84                        | 0.07  | 0.01 | 0.009  | 0.75 |
| rs312726   | 17 | 65799923  | T/G | 0.34 | <i>KCNJ2, LOC100133226</i> | 17q24    | intergenic | 0.01  | 0.78                        | 0.02  | 0.38 | -0.002 | 0.89 |
| rs420572   | 17 | 65808955  | T/C | 0.34 | <i>KCNJ2, LOC100133226</i> | 17q24    | intergenic | 0.01  | 0.76                        | 0.03  | 0.34 | -0.01  | 0.73 |
| rs312701   | 17 | 65809179  | G/C | 0.34 | <i>KCNJ2, LOC100133226</i> | 17q24    | intergenic | 0.04  | 0.32                        | 0.03  | 0.30 | -0.01  | 0.73 |
| rs10738708 | 9  | 25231316  | A/C | 0.43 | <i>LOC100129669, TUSC1</i> | 9p21     | intergenic | 0.04  | 0.32                        | 0.06  | 0.04 | -0.005 | 0.89 |
| rs7386942  | 8  | 1890157   | G/A | 0.48 | <i>ARHGEF10</i>            | 8p23     | intron     | -0.04 | 0.30                        | -0.02 | 0.46 | -      | 0.99 |
| rs4448128  | 6  | 116137499 | C/G | 0.25 | <i>LOC441167, FRK</i>      | 6q21-q22 | intergenic | -0.06 | 0.14                        | -0.02 | 0.43 | 0.008  | 0.81 |

Gene base position based on NCBI36/hg18 build. P-values of significant SNPs are italicized ( $P < 4.13 \times 10^{-7}$ ). Abbreviations: Chr, chromosome; MAF, minor allele frequency.

## 1.2 Supplementary Table 2. Candidate Diabetes Genes.

| Gene           | Description                                      | Chr | Position                | No. MetaboChip SNPs |
|----------------|--------------------------------------------------|-----|-------------------------|---------------------|
| <i>PPARG</i>   | peroxisome proliferator-activated receptor gamma | 3   | 12,368,001-12,450,855   | 153                 |
| <i>IGF2BP2</i> | insulin-like growth factor 2 mRNA binding        | 3   | 186,844,221-187,025,521 | 212                 |
| <i>CDKN2A</i>  | cyclin-dependent kinase inhibitor 2A             | 9   | 21,957,751-21,965,038   | 26                  |
| <i>CDKN2B</i>  | cyclin-dependent kinase inhibitor 2B             | 9   | 21,992,902-21,999,312   | 53                  |
| <i>TCF7L2</i>  | transcription factor 7-like 2                    | 10  | 114,699,999-114,916,060 | 133                 |
| <i>KCNQ1</i>   | potassium voltage-gated channel, KQT-like        | 11  | 2,422,797-2,826,916     | 836                 |

|               |                                 |    |                         |    |
|---------------|---------------------------------|----|-------------------------|----|
| <i>HNFI1A</i> | transcription factor 1, hepatic | 12 | 119,900,932-119,924,697 | 33 |
|---------------|---------------------------------|----|-------------------------|----|

List of SNPs localized to candidate diabetes genes by MetaboChip gene annotation that pass quality control. Gene base position based on NCBI36/hg18 build.

## **2 Supplementary Figures**

### **2.1 Supplementary Figure 1. Correlation Plots for HOMA-B and corrected HOMA-B.**

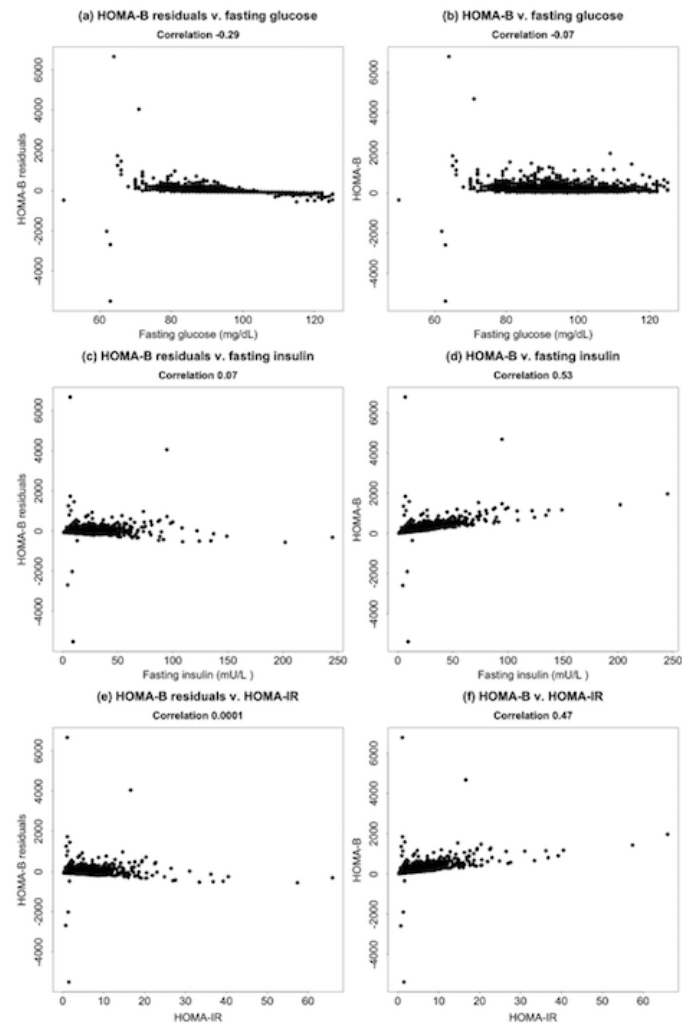

Pearson correlation calculated with fasting glucose, fasting insulin, and HOMA-IR for HOMA-B [(a), (c), (e)] and cHOMA-B [(b), (d), (f)], respectively.

## 2.2 Supplementary Figure 2. Quantile-Quantile Plots for HOMA-B Residuals, Log HOMA-IR, and Diabetes.

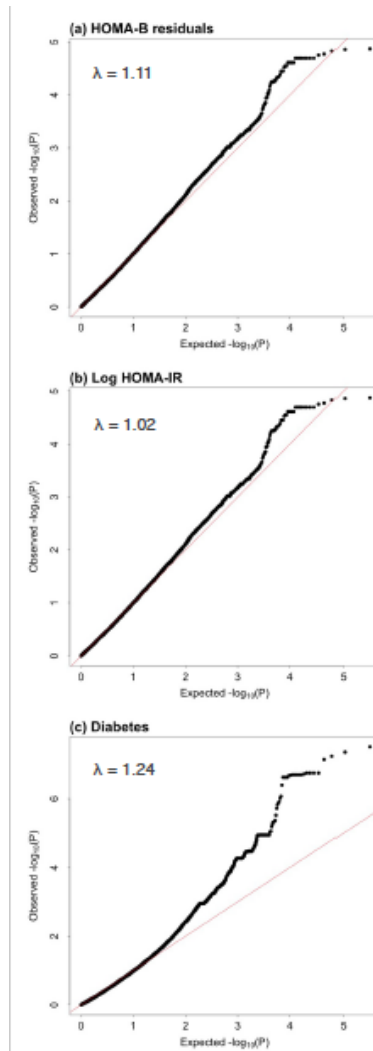

Deviation from expected p-values adjusted for genomic inflation using MetaboChip for (a) HOMA-B residuals, (b) Log HOMA-IR, and (c) Diabetes. The genomic inflation factor ( $\lambda$ ) for cHOMA-B, HOMA-IR, and diabetes were estimated to be 1.11, 1.02, and 1.24, respectively
